# Supplementary material for: A Recombinant Snake Cathelicidin Derivative Peptide: Antibiofilm Properties and Expression in Escherichia coli
Source: PubMed Central journal article supplement (PMC6315654; doi:10.3390/biom8040118), 2018-10-22
Supplement: biomolecules-08-00118-s001.pdf [file biomolecules-08-00118-s001.pdf]

## Supplementary Material

# A Recombinant Snake Cathelicidin Derivative Peptide: Antibiofilm Properties and Expression in *Escherichia coli*

Mercedeh Tajbakhsh <sup>1</sup>, Maziar Mohammad Akhavan <sup>2</sup>, Fatemeh Fallah <sup>1</sup> and Abdollah Karimi <sup>1,\*</sup>

<sup>1</sup> Pediatric Infections Research Center (PIRC), Research Institute for Children Health, Shahid Beheshti University of Medical Sciences, 1546815514 Tehran, Iran; mercedeh.tajbakhsh@gmail.com or m\_tajbakhsh@sbmu.ac.ir (M.T.); fafallah@sbmu.ac.ir (F.F.)

<sup>2</sup> Skin Research Center, Shahid Beheshti University of Medical Sciences, 1989934148 Tehran, Iran; m\_akhavan@sbmu.ac.ir

\* Correspondence: dr.karimi@sbmu.ac.ir; Tel.: +98-212-222-9641

Received: 8 October 2018; Accepted: 17 October 2018; Published: 22 October 2018

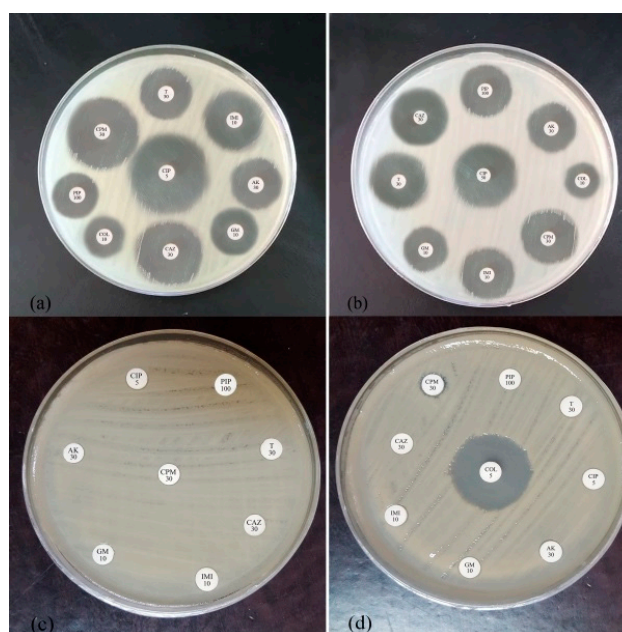

**Figure S1.** The antibiotic susceptibility tests by disk diffusion method. (a): Antimicrobial activity against *E.coli* ATCC 25922, (b): Antimicrobial activity against *P.aeruginosa* ATCC 27863, (c): Antimicrobial activity against MDR clinical *A.baumannii* no.7, (d): Antimicrobial activity against MDR clinical *P.aeruginosa* no.4. The strains were assessed against the following antibiotic disks: PIP(piperacillin, 100 µg),CAZ(ceftazidime ,30µg), CPM(cefepime, 30µg),IMI (imipenem, 10µg),GM (gentamicin, 10µg), AK(amikacin, 30µg), T(tetracycline, 30µg), CIP(ciprofloxacin, 5µg) and COL (colistin. 5 µg).

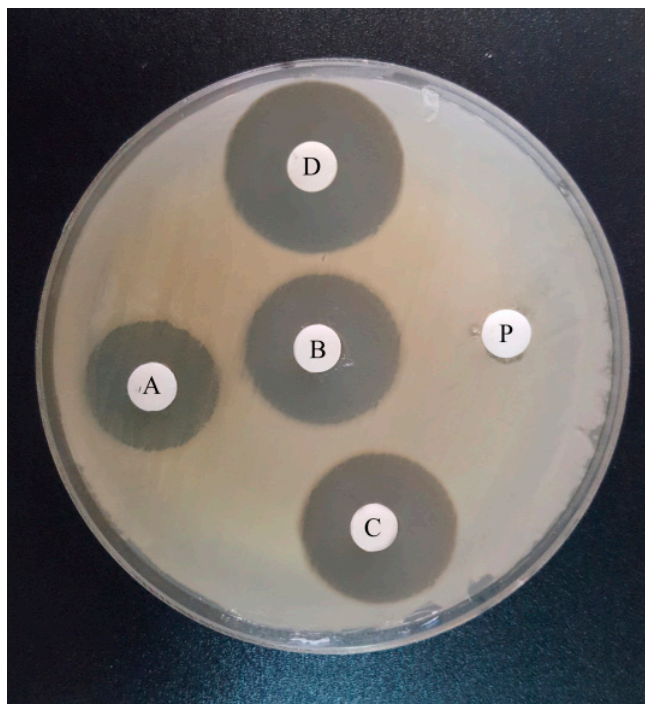

**Figure S2.** Antimicrobial activity against MDR clinical *P. aeruginosa* no 4 (A-D; 128, 256, 512 and 1000  $\mu\text{g/ml}$  concentrations of synthetic peptide respectively, P: purified recombinant Cath-A peptide).

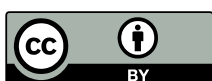

© 2018 by the authors. Submitted for possible open access publication under the terms and conditions of the Creative Commons Attribution (CC BY) license (<http://creativecommons.org/licenses/by/4.0/>).
